# Supplementary material
Source: MDPI journal article supplement (https://www.mdpi.com/2673-4532/5/2/11)

**Table S1.** Manufacture characteristics of the studied Spanish sheep cheese.

|                               |                        | I-CL                                                                                                            | T-CL                                                |
|-------------------------------|------------------------|-----------------------------------------------------------------------------------------------------------------|-----------------------------------------------------|
| <b>Production location</b>    |                        | <i>Castilla-y-León</i> , Spain                                                                                  | <i>Castilla-y-León</i> , Spain                      |
| <b>Elaboration</b>            |                        | Big industries under the regulations of the PGI                                                                 | Small/familiar cheeseries under artisanal procedure |
| <b>Commercial designation</b> |                        | Castellano sheep cheese                                                                                         | Artisanal/Traditional Castellano sheep cheese       |
| <b>Sheep breed</b>            |                        | Castellana & Churra                                                                                             | Castellana & Churra                                 |
| <b>Milk pre-treatment</b>     |                        | Raw                                                                                                             | Raw                                                 |
| <b>Starter culture</b>        |                        | Homofermentative mesophilic cultures (LAB)                                                                      | Homofermentative mesophilic cultures (LAB)          |
| <b>Rennet</b>                 |                        | Recombinant chymosin                                                                                            | Natural rennet from lambs                           |
| <b>Coagulation</b>            | <b>T (°C)</b>          | 32                                                                                                              | 28 - 32                                             |
|                               | <b>Time (min)</b>      | 35 - 40                                                                                                         | 30 - 45                                             |
| <b>Cutting curd</b>           |                        | Automated process in continuous                                                                                 | Semi-continuous process                             |
|                               | <b>Grain size (mm)</b> | 5 - 8                                                                                                           | 5 - 10                                              |
| <b>Stirring</b>               |                        | Automated process in continuous                                                                                 | Manual discontinuous                                |
| <b>Pre-drainage of whey</b>   |                        | Automated process in continuous: stirring and bombing the whey milk                                             | By soft draining                                    |
| <b>Cooking/Scalding</b>       | <b>T (°C)</b>          | 35 - 38                                                                                                         | 35 - 40                                             |
|                               | <b>Time (min)</b>      | 40                                                                                                              | 30 - 40                                             |
| <b>Pre-pressing</b>           |                        | Automated process in continuous: in blocks, according to the mold size                                          | Manual: according to curdling vats                  |
|                               | <b>T (°C)</b>          | 30 - 32                                                                                                         | 30 - 32                                             |
|                               | <b>Time (min)</b>      | 30                                                                                                              | 30                                                  |
| <b>Molding</b>                |                        | Manual                                                                                                          | Manual                                              |
| <b>Pressing</b>               |                        | Automated process                                                                                               | Automated process                                   |
|                               | <b>Time (h)</b>        | 10 - 12                                                                                                         | 10                                                  |
| <b>Unmolding</b>              |                        | Automated process                                                                                               | Manual                                              |
| <b>Salting</b>                |                        | Soaking in brine (0.2 g NaCl/mL)                                                                                | Soaking in brine (0.2 g NaCl/mL)                    |
|                               | <b>T (°C)</b>          | 10                                                                                                              | 10 - 15                                             |
|                               | <b>Time (h)</b>        | 24 - 30                                                                                                         | 24 - 32                                             |
| <b>Ripening</b>               |                        | Automated process in rooms with automated control of temperature and relative humidity.                         | Rooms with natural conditions                       |
|                               | <b>T (°C)</b>          | 10                                                                                                              | 10 - 12                                             |
|                               | <b>Humidity (%)</b>    | 75 - 80                                                                                                         | 75 - 80                                             |
|                               | <b>Time (d)</b>        | - Minimum of 60 d for cheeses heavier than 1.5 kg.<br>- Semi-cured cheese: 60 - 90 d.<br>- Cured cheese: 180 d. |                                                     |

I-CL = pieces produced in a large industry in *Castilla y León*; T-CL = manufactured according to a traditional procedure in small cheesery in *Castilla y León*. LAB = lactic acid bacteria. T = temperature (°C). RH = relative humidity (%).

**Table S2.** Studied range and selected values for the optimization of the NMR parameters.

|                          | Studied range | Selected value | 1D experiment                          |
|--------------------------|---------------|----------------|----------------------------------------|
| Temperature (°C)         | 4-25          | 25             | 1D-NOESY, $T_2$ filter<br>(CPMG), DIFF |
| Spinning frequency (kHz) | 4-6           | 6              |                                        |
| Spectrum Width (ppm)     | 16.7-25.0     | 25             |                                        |

**Figure S1.** Example of a  $^1\text{H}$ , $^1\text{H}$ -COSY spectrum for the structural elucidation of metabolites.

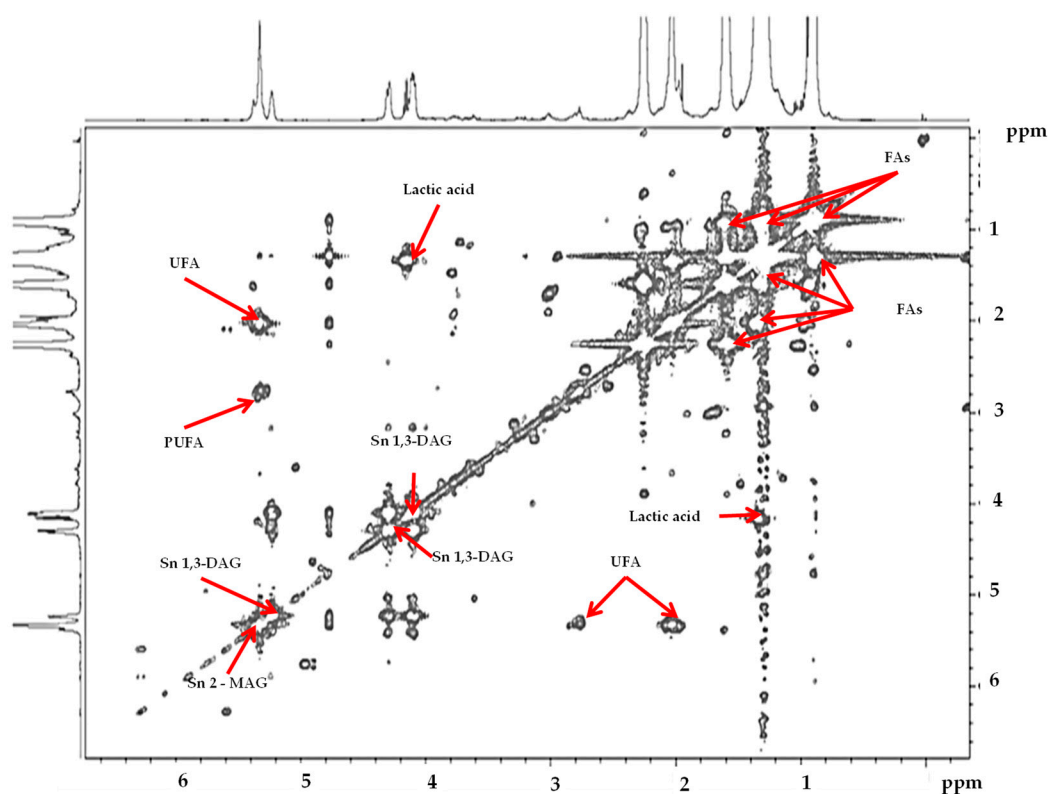

Supplement: s1 [file s1]
